# Supplementary material
Source: publisher site journal article supplement (https://www.degruyter.com/publication/journal_key/OPPHIL/downloadAsset/OPPHIL_Instruction%20for%20Authors.pdf?fbclid=IwAR0y5tDsCWEfrBhbnQIYu5A_ND-TPrpetI8X6M3K_x2NYaKC7JtGgqVSe3U)
Supplement: Supplementary file 1 [file OPPHIL_Instruction%20for%20Authors.pdf]

## Instruction for Authors

---

### SCOPE

*Open Philosophy* is an international Open Access, peer-reviewed academic journal covering all areas of philosophy. The objective of *Open Philosophy* is to foster free exchange of ideas and provide an appropriate platform for presenting, discussing and disseminating new concepts, current trends, theoretical developments and research findings related to the broadest philosophical spectrum. The journal does not favour any particular philosophical school, perspective or methodology.

### EDITORIAL POLICY

#### Unpublished material

Submission of a manuscript implies that the work described is not copyrighted, published or submitted elsewhere, except in abstract form. The corresponding author should ensure that all authors approve the manuscript before its submission.

#### Conflict of interest

When authors submit a manuscript, they are responsible for recognizing and disclosing financial and/or other conflicts of interest that might bias their work and/or could inappropriately influence his/her judgment. If no specified acknowledgement is given, the Editors assume that no conflict of interest exists.

#### Copyright

All authors retain copyright, unless –due to their local circumstances –their work is not copyrighted. The copyrights are governed by the Creative-Commons Attribution Only license (CC-BY) which is compliant with Plan-S. The use of each article will be governed by the Creative Commons Attribution license. The corresponding author grants De Gruyter the license to use of the article, by signing the Open Access License. Scanned copy of license should be sent to the journal, as soon as possible.

#### Authorship

Authorship should be limited to those who have made a significant contribution to the conception, design, execution, or interpretation of the reported study. All those who have made significant contributions should be listed as co-authors. Where there are others who have participated in certain substantive aspects of the research project, they should be named in an Acknowledgement section.

#### Peer Review process

The Editors reserve the right to decline the submitted manuscript without review, if the studies reported are not sufficiently novel or important to merit publication in the journal. Manuscripts deemed unsuitable (insufficient originality or of limited interest to the target audience) are returned to the author(s) without review. The Editor seeks advice from experts in the appropriate field. Research articles and communications are refereed by a minimum of two reviewers, review papers by at least three. The journal uses double-blind peer review model. Authors are requested to suggest persons competent to review their manuscript. However, please note that this will be treated only as a suggestion, and the final selection of reviewers is exclusively the Editor's decision. The final decision of acceptance is made by Managing Editor or, in case of conflict, by the Editor-in-Chief.

#### Scientific Misconduct

This journal publishes only original manuscripts that are not also published or going to be published elsewhere. Multiple submissions/publications, or redundant publications (re-packaging in different words of data already published by the same authors) will be rejected. If they are detected only after publication, the journal reserves the right to publish a Retraction Note. In each particular case Editors will follow [COPE's Code of Conduct](#) and implement its advice.

### ELECTRONIC SUBMISSION

*Open Theology* encourages the submission of both substantial full-length bodies of work and shorter manuscripts that report novel findings. There are no specific length restrictions for the overall manuscript or individual sections; however, we urge the authors to present and discuss their findings in a concise and accessible manner. All submitted manuscripts must be written in English.

Manuscripts submitted under multiple authorship are reviewed on the assumption that all listed authors concur in the submission and are responsible for its content; they must have agreed to its publication and have given the corresponding author the authority to act on their behalf in all matters pertaining to publication. The corresponding author is responsible for informing the coauthors of the manuscript status throughout the submission, review, and production process.

All submissions must be made via online submission system Editorial Manager <https://www.editorialmanager.com/opphil/>. In case of problems, please write to [opentphilosophy@degruyter.com](mailto:opentphilosophy@degruyter.com).

## Electronic Formats Allowed

We accept submission of text, tables and figures as separate files or as a composite file. For your initial submission, we recommend you upload your entire manuscript, including tables and figures, as a single PDF file. If you are invited to submit a revised manuscript, please provide us with individual files: an editable text and publication-quality figures.

- Text files can be submitted in the following formats:
  - MS Word - standard DOCUMENT (.DOC)
  - RICH TEXT FORMAT (.RTF)
  - PDF (not applicable for re-submitted or accepted manuscripts, see below).
- Tables should be submitted as MS Word or PDF (not applicable for re-submitted or accepted manuscripts, see below). Please note that a straight Excel file is not an acceptable format.
- Graphics files can be submitted in any of the following graphic formats: EPS; BMP; JPG; TIFF; GIF or PDF. Please note that Powerpoint files are not accepted.

Post-acceptance, text files of the revised manuscript and tables are required for use in the production. Authors should clearly indicate the location(s) of tables and figures in the text if these elements are given separately or at the end of the manuscript. If this information is not provided to the editorial office, we will assume that they should be left at the end of the text.

## Submission of Revised Articles

Resubmitted manuscripts should be accompanied by a letter outlining a point-by-point response to Editor's and reviewers' comments and detailing the changes made to the manuscript. A copy of the original manuscript should be included for comparison if the Editor requests one. If it is the first revision, authors need to return the revised manuscript within 21 days; if it is the second revision, authors need to return the revised manuscript within 14 days. Additional time for resubmission must be requested in advance. If the above mentioned deadlines are not met, the manuscript will be treated as a new submission.

For resubmitted manuscripts, please provide us with an editable text and publication-quality figures. Supply any figures as separate high-resolution, print-ready digital versions.

In addition to the editorial remarks, authors are asked to take care that they have prepared the revised version according to the journal's style.

## ORGANIZATION OF THE MANUSCRIPT

We draw particular attention to the importance of carefully preparing the title, keywords and abstract, as these elements are indicators of the manuscript content in bibliographic databases and search engines.

### Title

We suggest the title should be informative, specific to the project, yet concise (75 characters or fewer). Please bear in mind that a title that is comprehensible to a broad academic audience and readers outside your field will attract a wider readership. Avoid specialist abbreviations and non-standard acronyms. Titles should not be presented in title case (words should not be capitalized). Please also provide a brief "running title" of not more than 50 characters.

### Authors, Affiliations, Addresses

One of the authors should be designated as the corresponding author to whom inquiries regarding the paper should be directed. It is the corresponding author's responsibility to ensure that the author list and the summary of the author contributions to the study are accurate and complete.

Manuscripts should be prepared for double-blind review process.

### Abstract

The abstract should not exceed 200 words. The abstract should give a summary of the content of the paper. Mention the main findings without going into methodological detail and summarize briefly the most important items of the paper. Because the abstract will be published separately by abstracting services, it must be complete and understandable without reference to the text.

### Keywords

List keywords for the work presented (maximum of 10), separated by commas. We suggest that keywords do not replicate those used in the title.

### References

References should be listed in the alphabetical order. In the text, citations should be put in footnote. References in figure captions and tables should be listed after references in the text. Please use the following style for the reference list:

#### Books:

Heiddeger, Martin. *Being and Time*. Oxford: Black well Publishers, 1962.

#### Book chapters:

O'Brien, Denis. "Immortal and Necessary Being in Plato and Plotinus." In *The Perennial Tradition of Neoplatonism*, edited by John J. Cleary, 39-103. Leuven: University Press, 1997.

#### Articles:

Trouillard, Jean. "Réminiscence et procession de l'âme selon Proclus." *Revue Philosophique de Louvain*. Quatrième série, 69:2 (1971), 177-189.

#### Citations

The cited sources should be listed in footnotes. Please use the following style:

surname of the author, abbreviated title, page.

e.g. Trouillard, "Réminiscence", 201.

#### Symbols and abbreviations

The use of special symbols, abbreviations, and acronyms is permitted so long as they are defined upon first mention in the article.

### OUTLINE OF THE PRODUCTION PROCESS

Once an article has been accepted for publication, the manuscript files are transferred into our production system to be language-edited and formatted. Language and technical editors reserve the privilege of editing manuscripts to conform with the stylistic conventions of the journal. Once the article has been typeset, PDF proofs are generated so that authors can approve all editing and layout.

#### Immediate Publication

Manuscripts ready for publication are promptly posted online. The manuscripts are considered to be ready for publication when the final proofreading has been performed by authors, and all concerns have been resolved. Authors should notice that no changes can be made to the articles after online publication.

### ARTICLE PROCESSING CHARGES

Article processing charges (APCs) are used to cover the costs of the peer-review process, professional typesetting and copyediting, as well as online hosting, long-term preservation, distribution to libraries and content aggregators worldwide, and extensive promotion to potential readers.

With regard to articles proposed for topical issues, authors are asked to check the information concerning payments in call for papers for the particular issue.

Details concerning the fees are available at

[https://www.degruyter.com/publication/journal\\_key/OPPHIL/downloadAsset/OPPHIL\\_Article%20Processing%20Charges.pdf](https://www.degruyter.com/publication/journal_key/OPPHIL/downloadAsset/OPPHIL_Article%20Processing%20Charges.pdf)

There are no submission charges.
